# Supplementary material for: Defective Mo2C as a promising electrocatalyst for the nitrogen reduction reaction
Source: Royal Society of Chemistry journal article supplement (doi:10.1039/d3cp00277b), 2023-01-01
Supplement: d3cp00277b1.pdf [file d3cp00277b1.pdf]

### Supporting Information

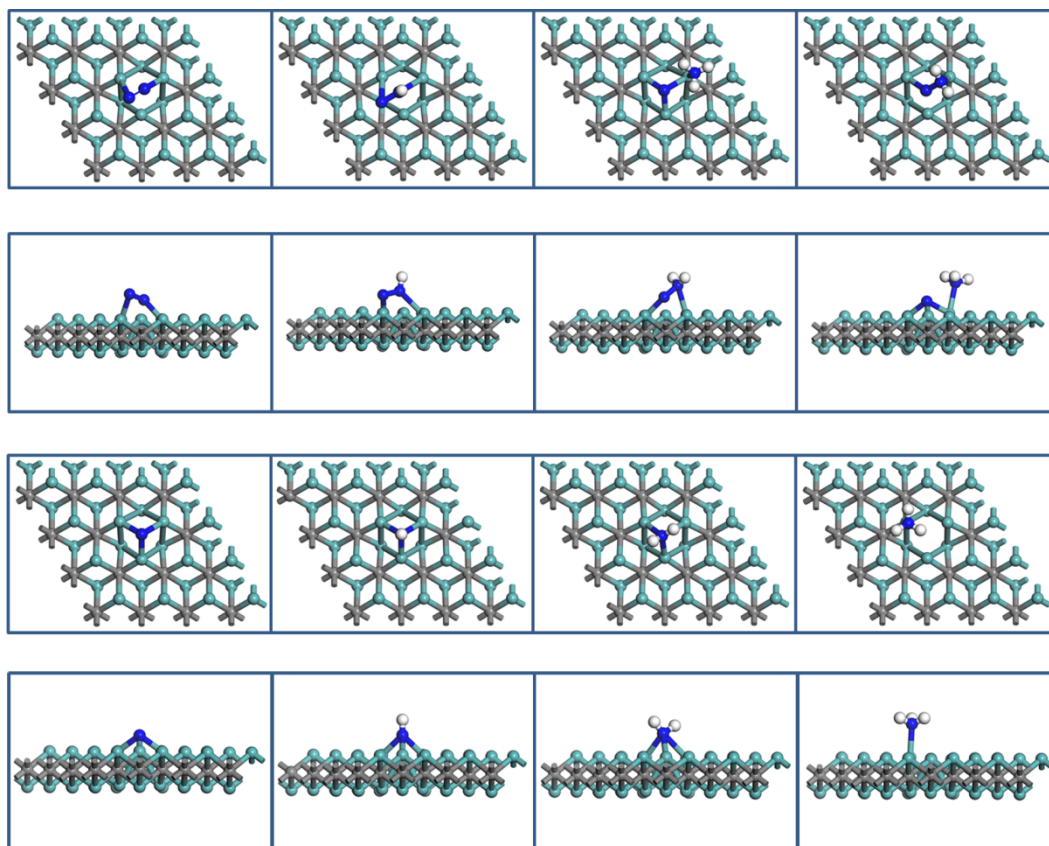

Figure S1. Optimized structures of reaction intermediate on  $V_C\text{-Mo}_2\text{C}$ .

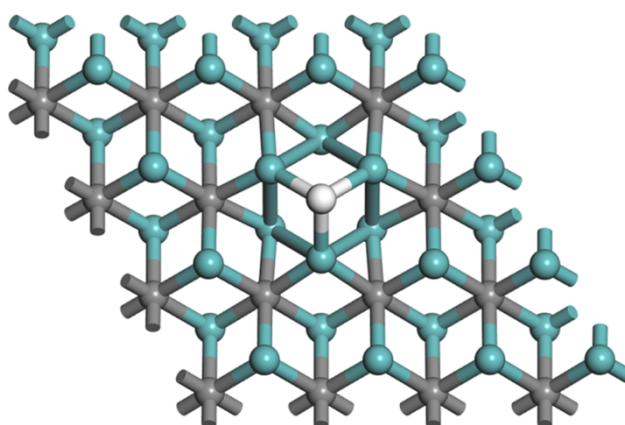

Figure S2. The optimized geometric structures of the adsorption of H on  $V_C\text{-Mo}_2\text{C}$ .

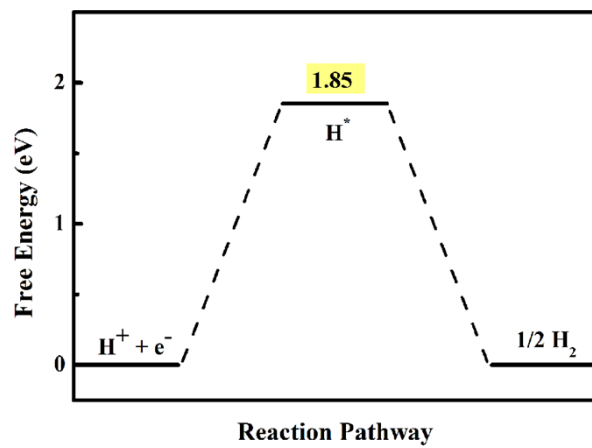

Figure S3. The Gibbs free energy diagram of HER on the V<sub>C</sub>-Mo<sub>2</sub>C.
